# Supplementary material
Source: PubMed Central journal article supplement (PMC5131365)
Supplement: NIHMS824501-supplement-Th114_4_Dewyer.pdf [file NIHMS824501-supplement-Th114_4_Dewyer.pdf]

**Supplementary Material to Dewyer, El-Sayed, et al. “Divergent effects of *Tlr9* deletion in experimental late venous thrombosis resolution and vein wall injury” (Thromb Haemost 2015; 114.4)**

Supplemental Fig 1

## Merged F4/80 – CCR2 in 8d thrombus

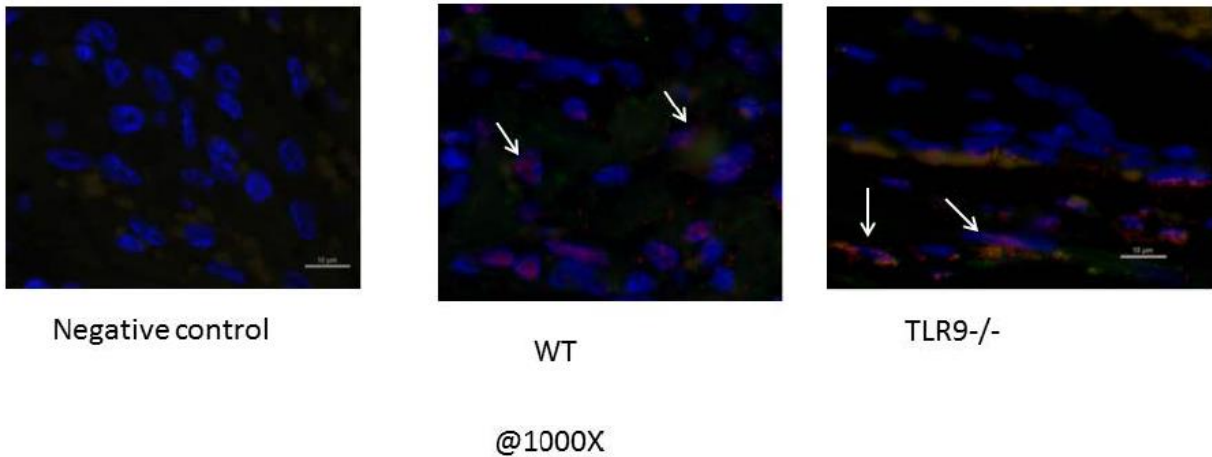

**Suppl. Figure 1:** Co-localization of F4/80 (green) with CCR2 (red) shows positive cell staining; nuclei are blue (DAPI) (n = 3 sample sections).

Supplemental  
Fig 2

## 21 day vein wall segments for CD31

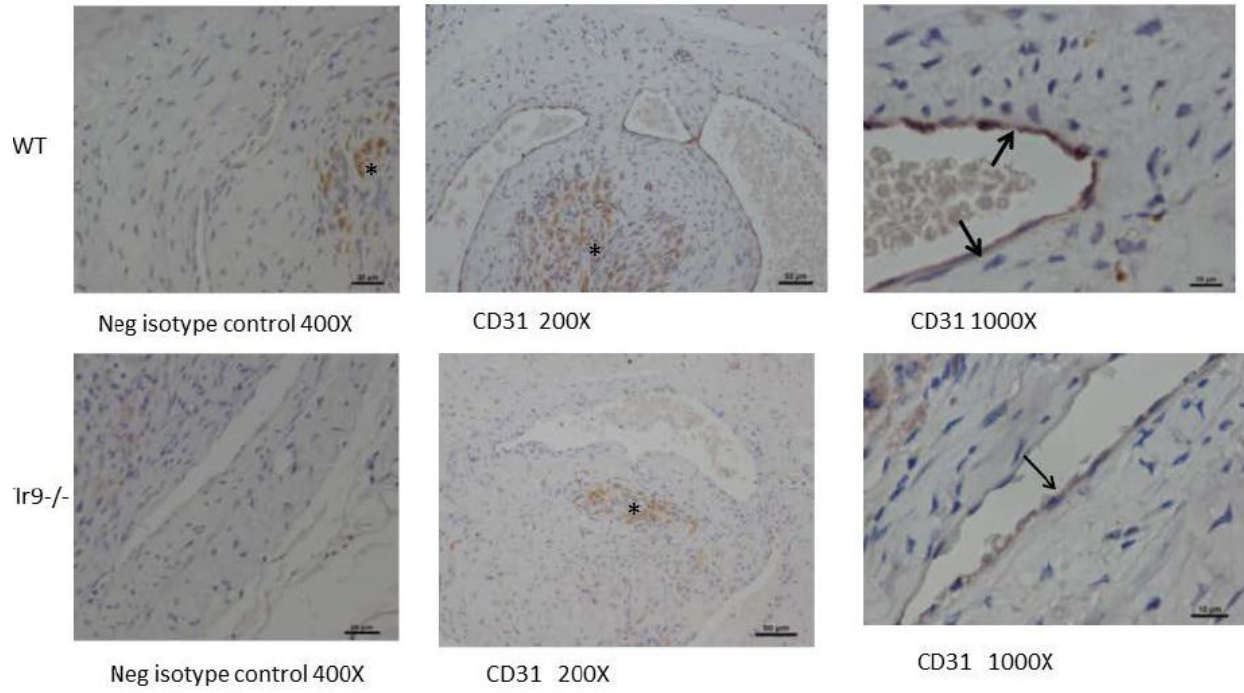

\* = hemosiderin. Arrows denote positive staining at 1000X

**Suppl. Figure 2:** Comparison of 21 day thrombosed IVC section with CD31 staining. More abluminal surface staining was present in WT as compared with Tlr9<sup>-/-</sup> mice (n = 3 samples sections).

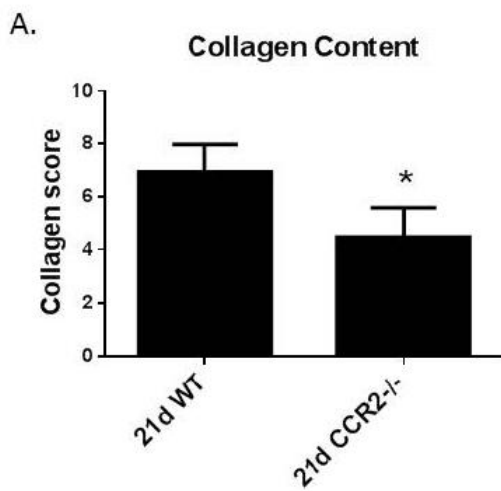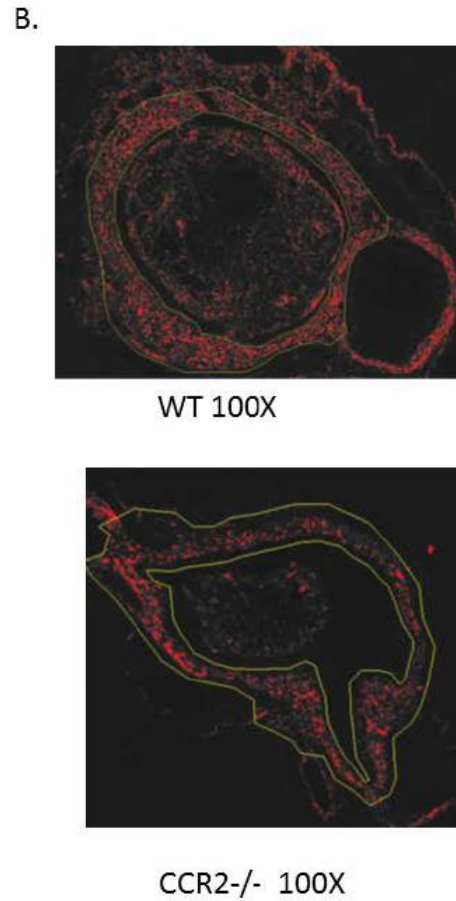

Supplemental Fig 3

**Suppl. Figure 3.** Late fibrosis response in CCR2<sup>-/-</sup> mice. A) Markedly less vein wall collagen is present in CCR2<sup>-/-</sup> mice as compared with WT;  $n = 5-7$ , \* =  $P < .05$ . B, C) Representative histologic sections are shown, with less dense collagen in CCR2<sup>-/-</sup> as compared with WT at 21d with Sirius Red staining.
